# Supplementary material
Source: publisher site journal article supplement (https://www.dovepress.com/article/390820)
Supplement: Supplementary file 1 [file get_supplementary_file.php]

**Supplemental Table 1**

Contrast-enhanced CT examination was performed on a 64-multidetector CT scanner ( GE Lightspeed VCT, USA).

| **Parameter** | **Values** |
| --- | --- |
| Width of beam collimation(mm) | 0.625-1.25 |
| Slice thickness(mm) | 5 |
| Pitch(mm) | 5 |
| Thickness of reconstructed image(mm) | 0.625 |
| Tube voltage(kV) | 120 |
| Tube current(mA) | 380 |
| Automatic tube current | Yes |
| Arterial phase acquisition time (s) | 36 |
| Portal venous phase acquisition time (s) | 65-70 |
| Equilibrium phase acquisition time (s) | 180-300 |

CT, computed tomography.

**Supplemental Table 2**

MRI with contrast agents was performed on a 3.0T MRI scanner with 8-channel body coil(TIM TRIO, Siemens, Erlangen, Germany) .

| **Sequence** | **TR**  **(ms)** | **TE**  **(ms)** | **Flip angle(°)** | **ST**  **(mm)** | **Spacing**  **(mm)** | **Matrix**  **size** | **FOV**  **(mm2)** |
| --- | --- | --- | --- | --- | --- | --- | --- |
| T2-weighted 2D FSE | 600 | 97 | 110 | 6 | 1 | 320×224 | 400×400 |
| Diffusion-weighted imaging | 2800 | 70 | - | 7 | 1 | 138×138 | 380×353 |
| T1-weighted in-and opposed- phase | 170 | 2.3(in-phase)/3.67(out of phase) | 65 | 7 | 1 | 256×200 | 380×297 |
| Dynamic T1-weighted 3D VIBE | 2.85 | 1.09 | 9 | 4 | 1 | 320×224 | 380×297 |

MRI, magnetic resonance imaging; TR, repetition time; TE, echo time; ST, slice thickness; FOV, field of view; FSE, fast spin echo; VIBE, volumetric interpolated breath-hold examination.

**Supplemental Table 3** The definition of imaging features in details.

| **Imaging feature** | **Definition** |
| --- | --- |
| ≥50% Hypovascular component in arterial phase | Quantitative assessment of hypovascular component comparing liver parenchyma in arterial phase |
| Tumor size | Measured as the maximum outer-edge-to-outer-edge dimension of the tumor (smaller than 50 mm and larger than 50 mm of the largest tumor) |
| Non-smooth tumor margin | Tumors with irregular margin and budding part on the edge of tumor in the transverse and/or coronal imaging |
| Internal arteries | The persistence of internal arterial enhancement within the tumor in the arterial phase |
| Non-rim arterial phase hyperenhancement | Non-rim like enhancement of HCC lesion relative to liver parenchyma in arterial phase |
| Non-peripheral ‘washout’ | Nonperipheral visually evaluated temporal enhancement in whole or in part comparing liver parenchyma in portal phase or delayed phase |
| Enhancing capsule | Smooth, uniform, sharp border around most or all of tumor visible as enhancing rim in portal phase or delayed phase |
| Corona enhancement | The existence of arterial-enhanced region adjacent to the tumor border in the arterial phase, which later presented isodense compared with the background liver parenchyma on CT images in the delayed phase images |
| Nodule-in-nodule | Presence of smaller inner nodule within and having different imaging features than larger outer nodule |
| Mosaic architecture | Presence of randomly distributed internal nodules or compartments, usually with different imaging features |
| Blood products in mass | Intralesional or perilesional hemorrhage in the absence of biopsy, trauma or intervention |
| Diffusion restriction | Higher lesion than background on DWI with a high b value (800s/mm2) |
| Mild-moderate T2 hyperintensity | Mild-moderate lesion signal intensity than background on T2WI |
| TP hypointensity | Low signal intensity by visual assessment of tumor on TP |
| Fat in mass,more than adjacent liver | Fat component on T1 opposed-phase |
| Rim arterial phase hyperenhancement | Irregularly shaped rim-like peripheral hyperenhancement with central low signal intensity area |
| Peripheral ‘washout’in PVP or DP/TP | Peripheral lower lesion signal intensity than background on PVP or DP/TP |
| Delayed central enhancement | Central area of progressive postarterial phase enhancement |
| Targetoid TP appearance | Concentric pattern in TP characterized by moderate-to-marked hypointensity in observation periphery with milder hypointensity in center |
| Targetoid diffusion restriction | Concentric pattern on DWI characterized by restricted diffusion in observation periphery with less restricted diffusion in observation center |
| Biliary dilatation | Dilatation of local intrahepatic bile ducts which presented low signal intensity around portal vein |
| Lymph node invasion | Enlarged lymph node holding enhancement pattern similar to the primary tumor |
| Liver capsular retraction | Local liver capsule depression toward liver parenchyma |

HCC, hepatocellular carcinoma; CT, computed tomography; DWI, diffusion-weighted imaging; T2WI, T2-weighted magnetic resonance imaging; PVP, portal vein phase; DP, delayed phase; TP, transitional phase.

**Supplemental Table 4** Inter-observer agreement of imaging features

| **Imaging feature** | **κ value** |
| --- | --- |
| Hypovascular component | 0.873 |
| Internal arteries | 0.759 |
| Tumor margin | 0.885 |
| LI-RADS category | 0.898 |
| Major imaging features |  |
| Non-rim like enhancment in AP | 0.868 |
| Non-peripheral ‘washout’in PVP or DP/TP | 0.840 |
| Enhancing capsule | 0.873 |
| Ancillary imaging features |  |
| Corona enhancement | 0.746 |
| Marked diffusion restriction | 0.615 |
| Mild-moderate T2 hyperintensity | 0.969 |
| TP hypointensity | 0.963 |
| Non-enhancing capsule | 0.660 |
| Nodule-in-nodule | 0.660 |
| Mosaic architecture | 0.870 |
| Fat in mass,more than adjacent liver | 0.652 |
| Blood products in mass | 0.892 |
| Targetoid mass, imaging appearance |  |
| Rim arterial phase hyperenhancement | 0.899 |
| Peripheral ‘washout’ in PVP or DP/TP | 0.793 |
| Delayed central enhancement | 0.817 |
| Targetoid TP appearance | 0.485 |
| Targetoid diffusion restriction | 0.489 |
| Biliary dilatation | 0.785 |
| Lymph node invasion | 0.735 |
| Liver capsular retraction | 0.859 |

LI-RADS, Liver Imaging Reporting and Data System; AP, arterial phase; PVP, portal vein phase; DP, delayed phase; TP, transitional phase.
